# Supplementary material for: Evaluation of methylations and external/internal standard quantification of lipids using gas chromatography-mass spectrometry
Source: Royal Society of Chemistry journal article supplement (doi:10.1039/c6ay02701f), 2016-12-07
Supplement: c6ay02701f1.xlsx [file c6ay02701f1.xlsx]

## Sheet: Sheet1
FAME	Ret. Time (min)	equation (External standard)	equation (nearest IS)		equation (IS C9:0)	equation (IS C17:0)	equation (IS C23:0)
C16:1 c9 U-40M	23.774	y = 3E+06x + 41545 R² = 0.998	y = 0.2322x + 0.0964 R² = 0.998	C15:0	y = 0.2797x + 0.0656 R² = 0.998	y = 0.242x + 0.1025 R² = 0.998	y = 0.259x + 0.1578 R² = 0.998
C18:1 t9 U-47M	28.885	y = 3E+06x + 27014 R² = 0.9993	y = 0.2627x + 0.0667 R² = 0.9993	C17:0	y = 0.3036x + 0.0427 R² = 0.9993	y = 0.2627x + 0.0667 R² = 0.9993	y = 0.2812x + 0.1026 R² = 0.9993
n-6 C18:2 U-59M	30.221	y = 5E+06x + 42090 R² = 0.9994	y = 0.4129x + 0.1039 R² = 0.9994	C17:0	y = 0.4773x + 0.0665 R² = 0.9994	y = 0.4129x + 0.1039 R² = 0.9994	y = 0.4421x + 0.1598 R² = 0.9994
n-3 C18:3 U-62M	31.708	y = 5E+06x + 15866 R² = 0.9999	y = 0.3757x + 0.0471 R² = 0.9999	C21:0	y = 0.4423x + 0.0251 R² = 0.9999	y = 0.3827x + 0.0391 R² = 0.9999	y = 0.4096x + 0.0602 R² = 0.9999
n-6 C20:4 U-71M	36.046	y = 4E+06x + 10749 R² = 0.9999	y = 0.2974x + 0.0319 R² = 0.9999	C21:0	y = 0.3501x + 0.017 R² = 0.9999	y = 0.3029x + 0.0265 R² = 0.9999	y = 0.3242x + 0.0408 R² = 0.9999
n-3 C20:5 U-99M	37.85	y = 4E+06x + 8182.6 R² = 1	y = 0.3467x + 0.0243 R² = 1	C21:0	y = 0.4081x + 0.0129 R² = 1	y = 0.3531x + 0.0202 R² = 1	y = 0.378x + 0.0311 R² = 1
C22:0 N-22M	38.572	y = 1E+07x - 6459.6 R² = 1	y = 1.0902x - 0.0238 R² = 1	C23:0	y = 1.2116x - 0.0102 R² = 1	y = 1.0482x - 0.0159 R² = 1	y = 1.1221x - 0.0245 R² = 1
C24:0 N-24M	46.742	y = 1E+07x - 38030 R² = 0.9997	y = 1.0594x - 0.1403 R² = 0.9997	C23:0	y = 1.1774x - 0.0601 R² = 0.9997	y = 1.0185x - 0.0938 R² = 0.9997	y = 1.0903x - 0.1444 R² = 0.9997
n-3 C22:6 U-84M	47.16	y = 4E+06x - 12033 R² = 0.9998	y = 0.3681x - 0.0444 R² = 0.9998	C23:0	y = 0.4091x - 0.019 R² = 0.9998	y = 0.3539x - 0.0297 R² = 0.9998	y = 0.3788x - 0.0457 R² = 0.9998
C8:0 N-8M	10.204	y = 1E+07x - 11385 R² = 0.9999	y = 1.3462x - 0.0205 R² = 0.9999	C7:0	y = 1.0005x - 0.0187 R² = 0.9999	y = 0.84x - 0.0284 R² = 0.9999	y = 0.8918x - 0.0434 R² = 0.9999
C13:0 N-13M	17.708	y = 1E+07x - 12511 R² = 0.9998	y = 1.398x - 0.0206 R² = 0.9998	C9:0	y = 1.398x - 0.0206 R² = 0.9998	y = 1.1737x - 0.0312 R² = 0.9998	y = 1.246x - 0.0477 R² = 0.9998
C15:1 U-38M	22.108	y = 4E+06x - 2564.2 R² = 0.9997	y = 0.3657x - 0.006 R² = 0.9997	C15:0	y = 0.4577x - 0.0042 R² = 0.9997	y = 0.3843x - 0.0064 R² = 0.9997	y = 0.408x - 0.0098 R² = 0.9997
C17:1 U-42M	26.073	y = 4E+06x - 4122.4 R² = 0.9997	y = 0.3525x - 0.0103 R² = 0.9997	C17:0	y = 0.4199x - 0.0068 R² = 0.9997	y = 0.3525x - 0.0103 R² = 0.9997	y = 0.3742x - 0.0157 R² = 0.9997
C18:1 U-49M	29.029	y = 4E+06x - 5845.3 R² = 0.9995	y = 0.3631x - 0.0146 R² = 0.9995	C17:0	y = 0.4325x - 0.0096 R² = 0.9995	y = 0.3631x - 0.0146 R² = 0.9995	y = 0.3855x - 0.0223 R² = 0.9995
C19:0 N-19M	31.071	y = 1E+07x - 25858 R² = 0.9991	y = 1.1771x - 0.0774 R² = 0.9991	C21:0	y = 1.4308x - 0.0426 R² = 0.9991	y = 1.2012x - 0.0646 R² = 0.9991	y = 1.2753x - 0.0985 R² = 0.9991
n-6 C20:2 U-68M	34.885	y = 4E+06x - 6558.3 R² = 0.9993	y = 0.3618x - 0.0196 R² = 0.9993	C21:0	y = 0.4398x - 0.0108 R² = 0.9993	y = 0.3692x - 0.0164 R² = 0.9993	y = 0.392x - 0.025 R² = 0.9993
n-6 C22:4 U-83M	42.775	y = 4E+06x - 6079.9 R² = 0.9991	y = 0.402x - 0.0232 R² = 0.9991	C23:0	y = 0.4511x - 0.01 R² = 0.9991	y = 0.3787x - 0.0152 R² = 0.9991	y = 0.402x - 0.0232 R² = 0.9991
n-3 C22:5 U-101M	45.731	y = 5E+06x - 7806.8 R² = 0.9989	y = 0.4502x - 0.0297 R² = 0.9989	C23:0	y = 0.5051x - 0.0129 R² = 0.9989	y = 0.424x - 0.0195 R² = 0.9989	y = 0.4502x - 0.0297 R² = 0.9989
C13:1 U-35M	18.656	y = 5E+06x - 6664.2 R² = 0.9993	y = 0.5255x - 0.0108 R² = 0.9993	C9:0	y = 0.5255x - 0.0108 R² = 0.9993	y = 0.4376x - 0.0163 R² = 0.9993	y = 0.4622x - 0.0247 R² = 0.9993
C16:0 N-16M	23.292	y = 1E+07x - 7257.5 R² = 0.9993	y = 1.1627x - 0.0166 R² = 0.9993	C15:0	y = 1.4596x - 0.0118 R² = 0.9993	y = 1.2153x - 0.0177 R² = 0.9993	y = 1.2837x - 0.0269 R² = 0.9993
C18:0 N-18M	28.263	y = 1E+07x - 8732.7 R² = 0.9993	y = 1.1683x - 0.0214 R² = 0.9993	C17:0	y = 1.4032x - 0.0142 R² = 0.9993	y = 1.1683x - 0.0214 R² = 0.9993	y = 1.2341x - 0.0324 R² = 0.9993
C18:1 U-48M	29.011	y = 4E+06x - 1739 R² = 0.9994	y = 0.3511x - 0.0043 R² = 0.9994	C17:0	y = 0.4217x - 0.0028 R² = 0.9994	y = 0.3511x - 0.0043 R² = 0.9994	y = 0.3709x - 0.0065 R² = 0.9994
C19:1 U-52M	31.423	y = 3E+06x - 920.78 R² = 0.9994	y = 0.2688x - 0.0027 R² = 0.9994	C21:0	y = 0.3284x - 0.0015 R² = 0.9994	y = 0.2735x - 0.0023 R² = 0.9994	y = 0.2889x - 0.0034 R² = 0.9994
C20:1 UX-67M	33.706	y = 4E+06x - 1462 R² = 0.9994	y = 0.3378x - 0.0043 R² = 0.9994	C21:0	y = 0.4127x - 0.0024 R² = 0.9994	y = 0.3436x - 0.0036 R² = 0.9994	y = 0.363x - 0.0054 R² = 0.9994
n-6 C20:3 U-69M	35.496	y = 4E+06x - 852.73 R² = 0.9994	y = 0.3303x - 0.0025 R² = 0.9994	C21:0	y = 0.4036x - 0.0014 R² = 0.9994	y = 0.336x - 0.0021 R² = 0.9994	y = 0.3549x - 0.0032 R² = 0.9994
n-6 C22:2 U-81M	40.836	y = 6E+06x - 1780.1 R² = 0.9996	y = 0.5332x - 0.0066 R² = 0.9996	C23:0	y = 0.6062x - 0.0029 R² = 0.9996	y = 0.5047x - 0.0044 R² = 0.9996	y = 0.5332x - 0.0066 R² = 0.9996
n-3 C22:3 U-82M	43.439	y = 5E+06x - 2216.9 R² = 0.9996	y = 0.4706x - 0.0082 R² = 0.9996	C23:0	y = 0.535x - 0.0036 R² = 0.9996	y = 0.4455x - 0.0054 R² = 0.9996	y = 0.4706x - 0.0082 R² = 0.9996
C5:0 N-5M	6.644	y = 5E+06x - 12999 R² = 0.9998	y = 0.6159x - 0.0234 R² = 0.9998	C7:0	y = 0.4596x - 0.0215 R² = 0.9998	y = 0.3857x - 0.0325 R² = 0.9998	y = 0.4073x - 0.0494 R² = 0.9998
C6:0 N-6M	8.093	y = 6E+06x - 13912 R² = 0.9999	y = 0.8826x - 0.025 R² = 0.9999	C7:0	y = 0.6586x - 0.023 R² = 0.9999	y = 0.5528x - 0.0348 R² = 0.9999	y = 0.5837x - 0.0528 R² = 0.9999
C10:0 N-10M	12.675	y = 1E+07x - 22414 R² = 0.9999	y = 1.2967x - 0.037 R² = 0.9999	C9:0	y = 1.2967x - 0.037 R² = 0.9999	y = 1.0883x - 0.0561 R² = 0.9999	y = 1.1492x - 0.0851 R² = 0.9999
C11:0 N-11M	14.205	y = 1E+07x - 21594 R² = 0.9999	y = 1.4009x - 0.0356 R² = 0.9999	C9:0	y = 1.4009x - 0.0356 R² = 0.9999	y = 1.1758x - 0.054 R² = 0.9999	y = 1.2416x - 0.082 R² = 0.9999
C11:1 c10 U-31M	15.045	y = 5E+06x - 9771.7 R² = 0.9998	y = 0.5183x - 0.0161 R² = 0.9998	C9:0	y = 0.5183x - 0.0161 R² = 0.9998	y = 0.4351x - 0.0244 R² = 0.9998	y = 0.4594x - 0.0371 R² = 0.9998
C12:1 cis-11 U-34M	16.813	y = 5E+06x - 8742.8 R² = 0.9998	y = 0.3816x - 0.02 R² = 0.9998	C15:0	y = 0.4869x - 0.0144 R² = 0.9998	y = 0.4087x - 0.0219 R² = 0.9998	y = 0.4315x - 0.0332 R² = 0.9998
C14:1 c9 U-36M	20.241	y = 4E+06x - 3964.4 R² = 0.9999	y = 0.3431x - 0.0091 R² = 0.9999	C15:0	y = 0.4379x - 0.0065 R² = 0.9999	y = 0.3675x - 0.0099 R² = 0.9999	y = 0.3881x - 0.0151 R² = 0.9999
C20:1 c8 U-65M	33.777	y = 3E+06x + 5058.8 R² = 0.9944	y = 0.2844x + 0.0127 R² = 0.9944	C17:0	y = 0.3388x + 0.0083 R² = 0.9944	y = 0.2844x + 0.0127 R² = 0.9944	y = 0.3003x + 0.0192 R² = 0.9944
C24:1 c15 U-88M	47.805	y = 4E+06x - 4208.7 R² = 0.9996	y = 0.3939x - 0.016 R² = 0.9996	C23:0	y = 0.4444x - 0.0069 R² = 0.9996	y = 0.373x - 0.0105 R² = 0.9996	y = 0.3939x - 0.016 R² = 0.9996
C4:0 N-4M	4.374	y = 2E+06x - 4816.9 R² = 0.9997	y = 0.3218x - 0.0087 R² = 0.9997	C7:0	y = 0.2399x - 0.008 R² = 0.9997	y = 0.2015x - 0.0121 R² = 0.9997	y = 0.2134x - 0.0184 R² = 0.9997
C12:0 N-12M	15.888	y = 1E+07x - 18496 R² = 0.9993	y = 1.3303x - 0.0306 R² = 0.9993	C9:0	y = 1.3303x - 0.0306 R² = 0.9993	y = 1.1173x - 0.0464 R² = 0.9993	y = 1.1836x - 0.0707 R² = 0.9993
C14:0 N-14M	19.557	y = 1E+07x - 25345 R² = 0.9992	y = 1.1147x - 0.0595 R² = 0.9992	C15:0	y = 1.3902x - 0.042 R² = 0.9992	y = 1.1676x - 0.0636 R² = 0.9992	y = 1.2369x - 0.0969 R² = 0.9992
C16:1 U-41M	23.757	y = 3E+06x - 6293.8 R² = 0.9992	y = 0.2774x - 0.0148 R² = 0.9992	C15:0	y = 0.3459x - 0.0104 R² = 0.9992	y = 0.2905x - 0.0158 R² = 0.9992	y = 0.3078x - 0.0241 R² = 0.9992
n-6 C18:2 U-60M	30.196	y = 4E+06x - 7672.2 R² = 0.9985	y = 0.3077x - 0.0193 R² = 0.9985	C17:0	y = 0.3664x - 0.0127 R² = 0.9985	y = 0.3077x - 0.0193 R² = 0.9985	y = 0.326x - 0.0293 R² = 0.9985
n-6 γ-C18:3 U-63M	30.826	y = 4E+06x - 8651.5 R² = 0.9987	y = 0.3235x - 0.0217 R² = 0.9987	C17:0	y = 0.3851x - 0.0143 R² = 0.9987	y = 0.3235x - 0.0217 R² = 0.9987	y = 0.3427x - 0.0331 R² = 0.9987
C20:1 c11 U-66M	33.83	y = 4E+06x - 6261.6 R² = 0.9988	y = 0.3249x - 0.0191 R² = 0.9988	C21:0	y = 0.39x - 0.0104 R² = 0.9988	y = 0.3276x - 0.0157 R² = 0.9988	y = 0.347x - 0.0239 R² = 0.9988
n-3 C20:3 U-70M	36.464	y = 5E+06x - 10368 R² = 0.9984	y = 0.4391x - 0.0316 R² = 0.9984	C21:0	y = 0.527x - 0.0172 R² = 0.9984	y = 0.4426x - 0.026 R² = 0.9984	y = 0.4689x - 0.0396 R² = 0.9984
C22:1 c13 U-79M	39.156	y = 4E+06x - 6767.1 R² = 0.9982	y = 0.3705x - 0.0259 R² = 0.9982	C23:0	y = 0.4164x - 0.0112 R² = 0.9982	y = 0.3497x - 0.017 R² = 0.9982	y = 0.3705x - 0.0259 R² = 0.9982
Table S1. Calibration equations of 45 FAMEs on the Rtx-Wax column with or without IS or with the same or different IS.
